# Supplementary material for: Tumor-Associated Trypsin Inhibitor (TATI) as a Biomarker of Poor Prognosis in Oropharyngeal Squamous Cell Carcinoma Irrespective of HPV Status
Source: MDPI journal article supplement (doi:10.3390/cancers13112811), 2021-06-04
Supplement: s1 [file s1]

# Supplemental material: Tumor-Associated Trypsin Inhibitor (TATI) as a Biomarker of Poor Prognosis in Oropharyngeal Squamous Cell Carcinoma Irrespective of HPV Status

Anni Sjöblom, Ulf-Håkan Stenman, Jaana Hagström, Lauri Jouhi, Caj Haglund, Stina Syrjänen, Petri Mattila, Antti Mäkitie and Timo Carpén

Table S1. TATI immunoscore.

| TATI Expression     | TATI in Lymphocytes (Scoring) | TATI in Tumor (Scoring) | TATI in Lymphocytes (Variable in Analysis) | TATI Tumor (Variable in Analysis) |
|---------------------|-------------------------------|-------------------------|--------------------------------------------|-----------------------------------|
| Negative            | -                             | 0                       | 0                                          | 0                                 |
| Mild positivity     | +                             | 1                       | 1                                          | 1                                 |
| Moderate positivity | ++                            | 2                       | 2                                          | 2                                 |
| Strong positivity   | +++                           | 3                       | 3                                          | 3                                 |

Table S2. Multivariate Cox regression analysis for overall-survival (OS) and disease-specific survival (DSS) with p16 as a separate variable.

| Variable                       | OS   |            |         | DSS  |            |         |
|--------------------------------|------|------------|---------|------|------------|---------|
|                                | HR   | 95% CI     | p-value | HR   | 95% CI     | p-value |
| Age                            | 1.08 | 1.03–1.14  | 0.003 * | 1.08 | 1.01–1.14  | 0.017 * |
| Smoking                        |      |            | 0.029 * |      |            | 0.198   |
| Ex-smoker versus never         | 1.20 | 0.27–5.39  | 0.813   | 0.63 | 0.10–4.01  | 0.623   |
| Current smoker versus never    | 4.65 | 1.27–17.07 | 0.021 * | 2.62 | 0.62–11.08 | 0.189   |
| Stage III–IV versus Stage I–II | 1.75 | 0.73–4.20  | 0.209   | 2.22 | 0.76–6.47  | 0.146   |
| p16- versus p16+               | 0.83 | 0.31–2.26  | 0.716   | 0.86 | 0.25–2.90  | 0.805   |
| S-TATI                         | 2.49 | 1.28–4.83  | 0.007 * | 2.54 | 1.09–5.94  | 0.031 * |

HR: Hazard ratio; CI: Confidence interval. S-TATI values are log-transformed.  $p \leq 0.05$  \*.
